# Supplementary material for: Dispersion of Au entities over Mo2N and MoC for the low-temperature water–gas shift reaction
Source: Royal Society of Chemistry journal article supplement (doi:10.1039/d4cy00489b), 2024-01-01
Supplement: d4cy00489b1.pdf [file d4cy00489b1.pdf]

## Supporting Information

### Dispersion of Au Entities over Mo<sub>2</sub>N and MoC for the Low-Temperature Water-Gas Shift Reaction

Peiyao Guo,<sup>ab</sup> Chuanchuan Jin,<sup>a</sup> Shaobo Han,<sup>a</sup> Yan Zhou,<sup>a\*</sup> Wenjie Shen<sup>a</sup>

<sup>a</sup> State Key Laboratory of Catalysis, Dalian Institute of Chemical Physics, Chinese Academy of Sciences, Dalian 116023, China. E-mail: zhouyan@dicp.ac.cn

<sup>b</sup> University of Chinese Academy of Sciences, Beijing 100049, China.

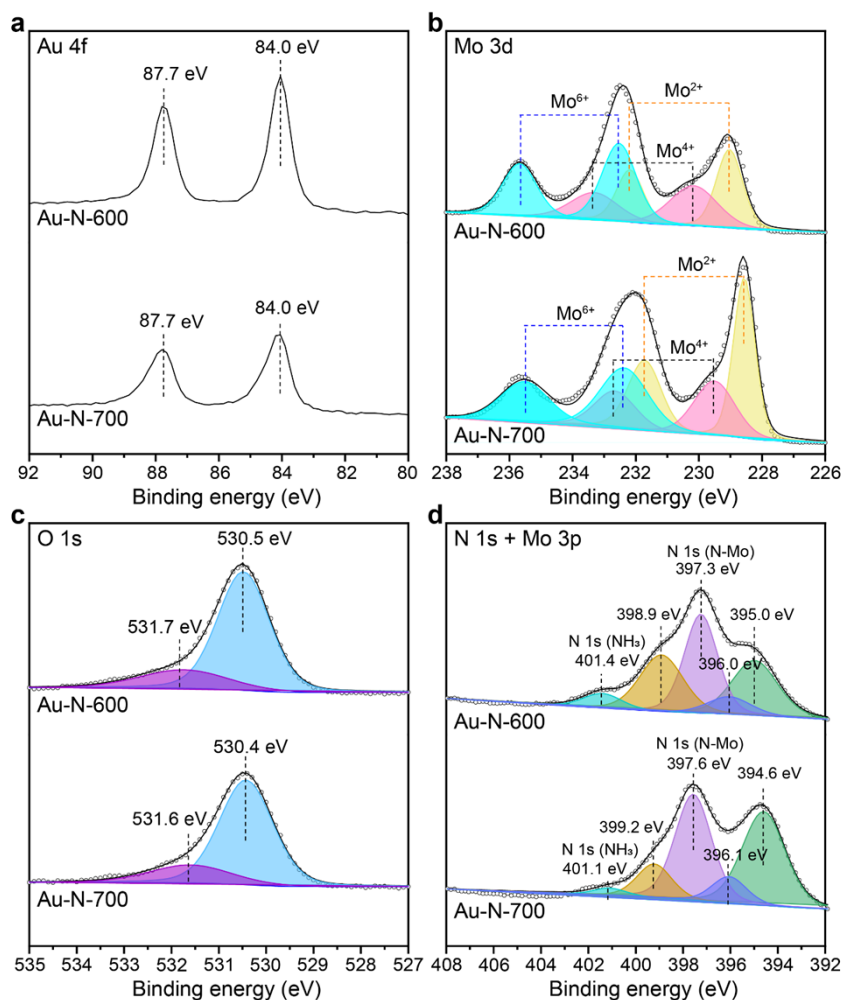

**Fig. S1** XPS spectra of Au 4f (a), Mo 3d (b), O 1s (c) and N 1s and Mo 3p (d) in the Au/ $\gamma$ -Mo<sub>2</sub>N samples. The binding energies at about 397.5 and 401 eV of N 1s peak are attributed to nitrogen of molybdenum nitride and chemisorbed NH<sub>3</sub>, respectively. The binding energies at about 395.0, 396.0 and 399.0 eV of Mo 3p are assigned to Mo<sup>2+</sup>, Mo<sup>4+</sup> and Mo<sup>6+</sup>, respectively.

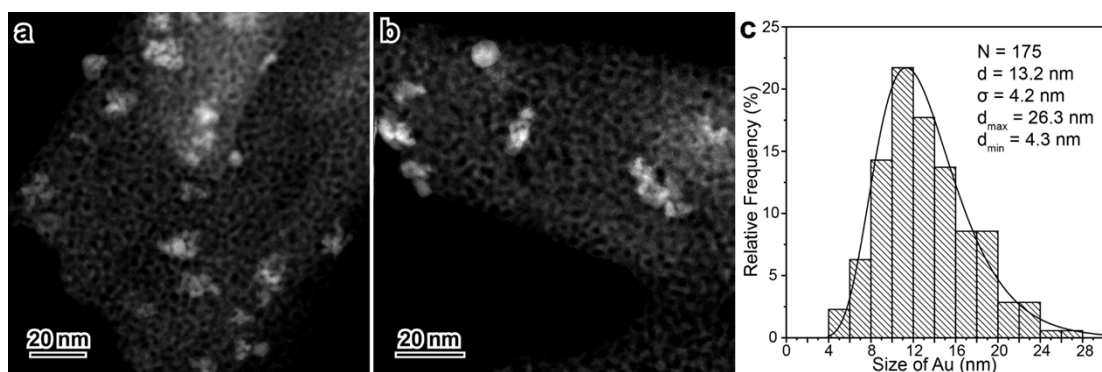

**Fig. S2** STEM images (a, b) and size-distribution of Au entities (c) in the Au-N-600 sample.

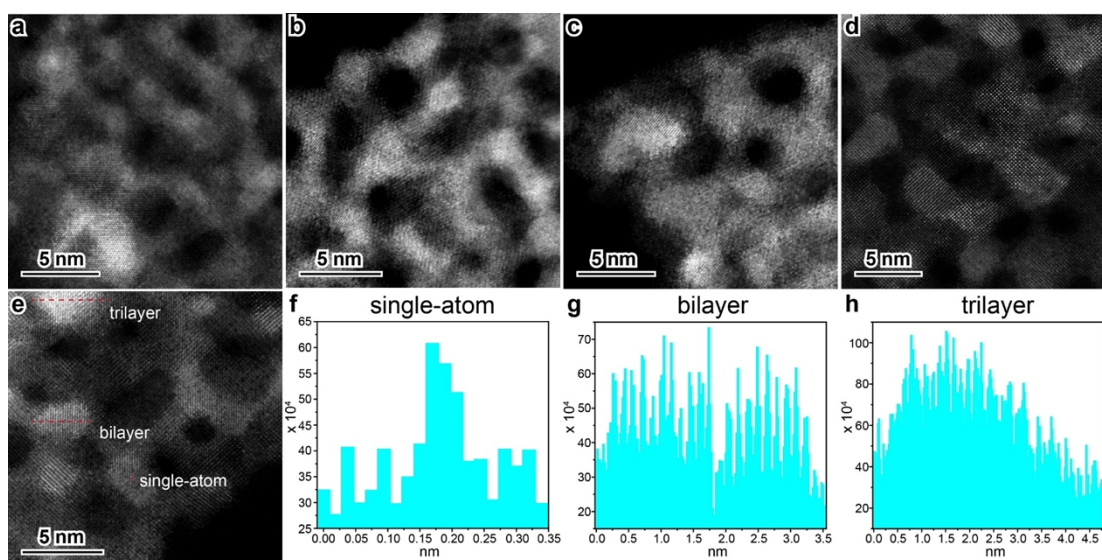

**Fig. S3** STEM images and line-profile intensities of the Au-N-700 sample. Identification of Au bilayer and trilayer was done by comparing the profile intensities with that of the Au single-atoms.

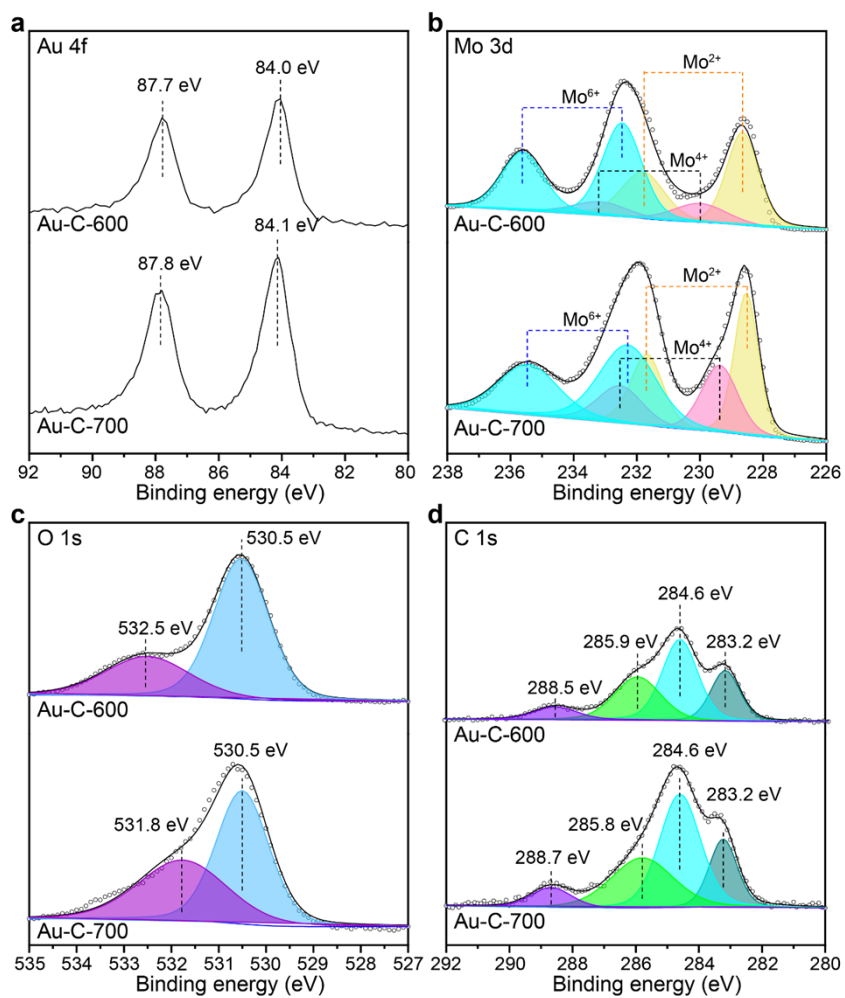

**Fig. S4** XPS spectra of Au 4f (a), Mo 3d (b), O 1s (c) and C 1s (d) in the Au/ $\alpha$ -MoC sample.

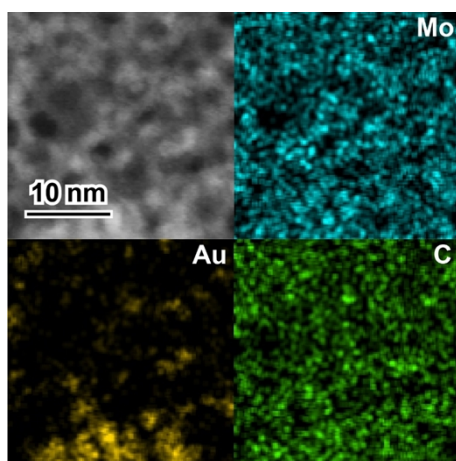

**Fig. S5** STEM-EDS elemental mappings of the Au-C-600 sample.

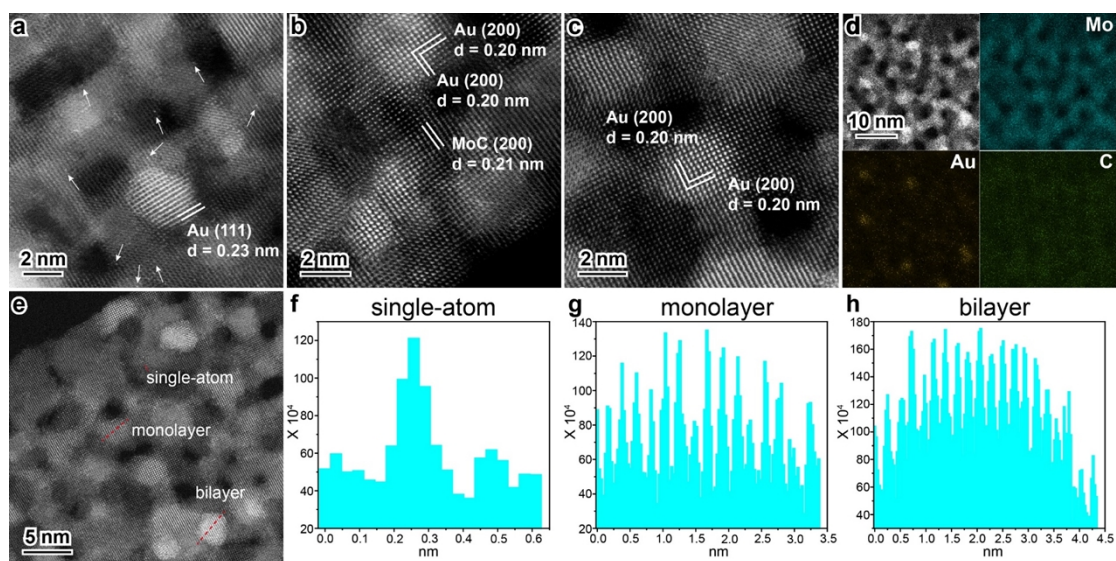

**Fig. S6** STEM images and line-profile intensities of the Au-C-700 sample. Identification of Au monolayer and bilayer was done by comparing the profile intensities with that of the Au single-atoms. The arrows indicated single-atoms.

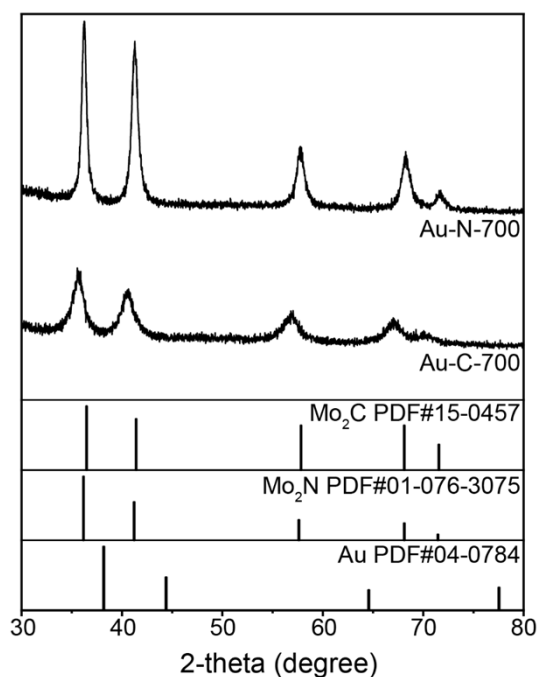

**Fig. S7** XRD patterns of the spent catalysts after WGS reaction at 200 °C.

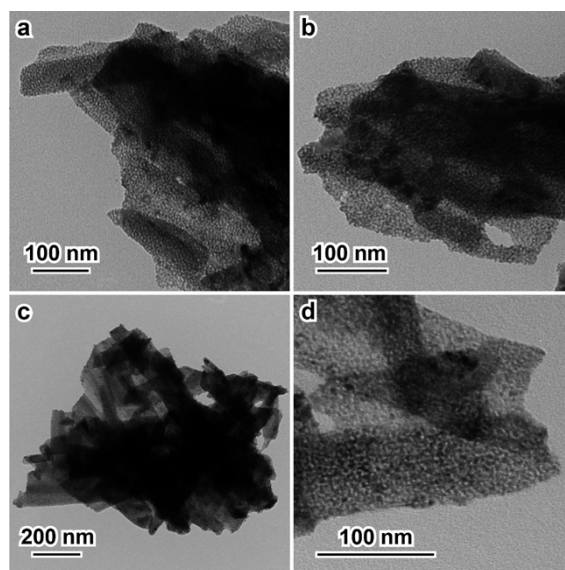

**Fig. S8** TEM images of the spent Au-N-700 (a, b) and Au-C-700 (c, d) catalysts after WGS reaction at 200 °C.

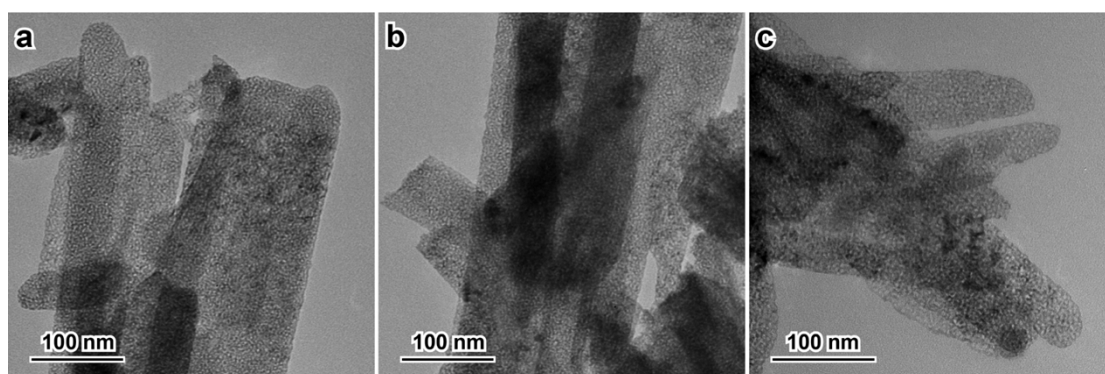

**Fig. S9** TEM images of  $\alpha$ -MoC.

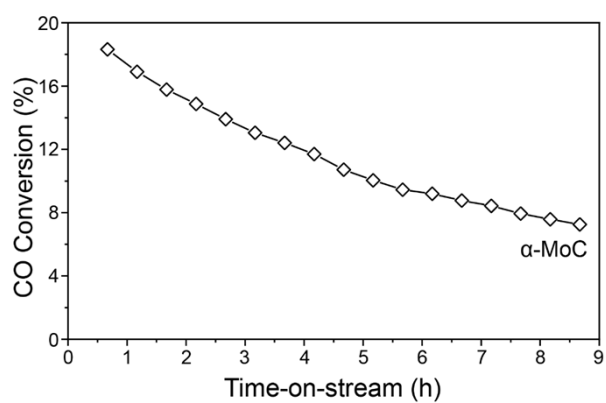

**Fig. S10** Water gas shift reaction over  $\alpha$ -MoC at 200 °C. Reaction condition: 5 mg  $\alpha$ -MoC with 195 mg quartz sand, a feed stream of 3.0 vol.% CO/6.0 vol.% H<sub>2</sub>O/He mixture at the flowrate of 66.7 mL min<sup>-1</sup>.

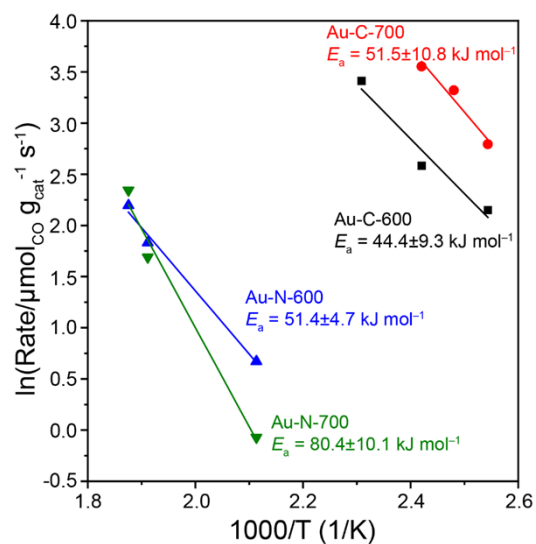

**Fig. S11** Apparent activation energies ( $E_a$ ) of the Au/ $\gamma$ -Mo<sub>2</sub>N and Au/ $\alpha$ -MoC catalysts.

Table S1. Cell parameters of  $\gamma$ -Mo<sub>2</sub>N and  $\alpha$ -MoC in the samples.

| Sample   | Phase                       | Cell parameters (nm) | Crystal size (nm) <sup>a</sup> |
|----------|-----------------------------|----------------------|--------------------------------|
| Au-N-600 | $\gamma$ -Mo <sub>2</sub> N | 0.419                | 6.6                            |
| Au-N-700 | $\gamma$ -Mo <sub>2</sub> N | 0.421                | 9.7                            |
| Au-C-600 | $\alpha$ -MoC               | 0.419                | 6.8                            |
| Au-C-700 | $\alpha$ -MoC               | 0.422                | 5.5                            |

<sup>a</sup> The crystal size was calculated from the FWHM of the {200} diffraction line.

Table S2. Coordinating environments of Au from *R*-space fittings of Au L<sub>3</sub>-edge EXAFS data.

| Sample   | Shell | R (Å) <sup>a</sup> | C.N. <sup>b</sup> | $\Delta E_0$ (eV) <sup>c</sup> | $\sigma^2$ (10 <sup>-3</sup> Å <sup>2</sup> ) <sup>d</sup> | R factor (%) |
|----------|-------|--------------------|-------------------|--------------------------------|------------------------------------------------------------|--------------|
| Au foil  | Au–Au | 2.86 ± 0.002       | 12.0 ± 0.04       | 5.6                            | 8.0                                                        | 0.3          |
| Au-N-600 | Au–Au | 2.86 ± 0.03        | 8.7 ± 0.3         | 6.6                            | 9.8                                                        | 0.5          |
|          | Au–Mo | 2.85 ± 0.09        | 0.4 ± 0.1         |                                | 2.8                                                        |              |
| Au-N-700 | Au–Au | 2.83 ± 0.004       | 7.5 ± 0.9         | 2.8                            | 10.6                                                       | 0.9          |
|          | Au–Mo | 2.83 ± 0.11        | 0.2 ± 0.4         |                                | 18.6                                                       |              |
| Au-C-600 | Au–Au | 2.88 ± 0.02        | 7.7 ± 1.0         | 7.6                            | 19.7                                                       | 0.7          |
|          | Au–Mo | 2.87 ± 0.01        | 1.5 ± 0.6         |                                | 8.7                                                        |              |
|          | Au–C  | 2.13 ± 0.03        | 0.5 ± 0.5         |                                | 11.6                                                       |              |
| Au-C-700 | Au–Au | 2.86 ± 0.01        | 7.3 ± 0.6         | 4.6                            | 9.0                                                        | 1.0          |
|          | Au–Mo | 2.82 ± 0.03        | 1.3 ± 0.3         |                                | 9.0                                                        |              |
|          | Au–C  | 2.16 ± 0.04        | 0.6 ± 0.3         |                                | 9.0                                                        |              |

<sup>a</sup> Atomic distance; <sup>b</sup> Coordination number; <sup>c</sup> Difference of potential between the sample and the standard; <sup>d</sup> Debye-Waller factor.
